# Supplementary material
Source: PubMed Central journal article supplement (PMC8356144)
Supplement: jama-e2111684-s004.pdf [file jama-e2111684-s004.pdf]

\*Indicates required information. Only first name, last name, and suffix will appear in PubMed.

| *Group Name(s): BaSICS investigators and BRICNet members |              |                       |                                                |                                          |  |
|----------------------------------------------------------|--------------|-----------------------|------------------------------------------------|------------------------------------------|--|
| *First Name and Middle Initial(s)                        | *Last Name   | *Suffix (eg, Jr, III) | Institution                                    | Location (city, state/province, country) |  |
| Rodrigo                                                  | Biondi       |                       | Instituto de Cardiologia do Distrito Federal   | Brasilia, Federal District               |  |
| Renato B.                                                | Chaves       |                       | Instituto de Cardiologia do Distrito Federal   | Brasilia, Federal District               |  |
| Amanda R.                                                | Santos       |                       | Instituto de Cardiologia do Distrito Federal   | Brasilia, Federal District               |  |
| Vitor S.                                                 | Barzilai     |                       | Instituto de Cardiologia do Distrito Federal   | Brasilia, Federal District               |  |
| Flávio G. R.                                             | de Freitas   |                       | Hospital SEPACO                                | São Paulo, São Paulo                     |  |
| Nathaly F.                                               | Nunes        |                       | Hospital SEPACO                                | São Paulo, São Paulo                     |  |
| Rodrigo C.                                               | da Cunha     |                       | Hospital SEPACO                                | São Paulo, São Paulo                     |  |
| Elijane F.                                               | Alves        |                       | Hospital SEPACO                                | São Paulo, São Paulo                     |  |
| Rodrigo C.                                               | Figueiredo   |                       | Hospital São José – UNESC                      | Colatina, Espirito Santo                 |  |
| Rodrigo B.                                               | Bortolini    |                       | Hospital São José – UNESC                      | Colatina, Espirito Santo                 |  |
| Cintia L.                                                | Sartori      |                       | Hospital São José – UNESC                      | Colatina, Espirito Santo                 |  |
| Eduardo S.                                               | Marques      |                       | Hospital São José – UNESC                      | Colatina, Espirito Santo                 |  |
| Maria A                                                  | de Sousa     |                       | Hospital São Paulo – UNIFESP                   | São Paulo, São Paulo                     |  |
| Danieri Y. V.                                            | Tomotani     |                       | Hospital São Paulo – UNIFESP                   | São Paulo, São Paulo                     |  |
| Airton L. O.                                             | Manoel       |                       | Hospital Paulistano                            | São Paulo, São Paulo                     |  |
| Wilson J.                                                | Lovato       |                       | Hospital das Clínicas FMUSP Ribeirão Preto     | Ribeirao Preto, São Paulo                |  |
| Bruno G.                                                 | Dantas       |                       | Hospital das Clínicas FMUSP Ribeirão Preto     | Ribeirao Preto, São Paulo                |  |
| Leonardo C.                                              | Palma        |                       | Hospital das Clínicas FMUSP Ribeirão Preto     | Ribeirao Preto, São Paulo                |  |
| Fábio L.                                                 | da Silva     |                       | Hospital das Clínicas FMUSP Ribeirão Preto     | Ribeirao Preto, São Paulo                |  |
| Cristina P.                                              | Amendola     |                       | Hospital do Câncer de Barretos                 | Barretos, São Paulo                      |  |
| Luciana C.                                               | Sanches      |                       | Hospital do Câncer de Barretos                 | Barretos, São Paulo                      |  |
| Fernanda A. M.                                           | Scuoteguazza |                       | Hospital do Câncer de Barretos                 | Barretos, São Paulo                      |  |
| Ligia Z.                                                 | de Britto    |                       | Hospital do Câncer de Barretos                 | Barretos, São Paulo                      |  |
| Ary                                                      | Serpa        | Neto                  | Hospital Israelita Albert Einstein             | São Paulo, São Paulo                     |  |
| Niklas S.                                                | Campos       |                       | Hospital Israelita Albert Einstein             | São Paulo, São Paulo                     |  |
| Fabio B.                                                 | Hohmann      |                       | Hospital Israelita Albert Einstein             | São Paulo, São Paulo                     |  |
| Guilherme B.                                             | Olivato      |                       | Hospital Israelita Albert Einstein             | São Paulo, São Paulo                     |  |
| Jorge L.R.                                               | Paranhos     |                       | Santa Casa de Misericórdia de São João Del Rei | São Joao del Rei, Minas Gerais           |  |
| Iany G.                                                  | da Silva     |                       | Santa Casa de Misericórdia de São João Del Rei | São Joao del Rei, Minas Gerais           |  |
| Adilson de C.                                            | Meireles     |                       | Santa Casa de Misericórdia de São João Del Rei | São Joao del Rei, Minas Gerais           |  |
| Viviane C.                                               | Veiga        |                       | BP - A Beneficência Portuguesa de São Paulo    | São Paulo, São Paulo                     |  |
| Juliana C.                                               | Coelho       |                       | BP - A Beneficência Portuguesa de São Paulo    | São Paulo, São Paulo                     |  |
| Maiko M.                                                 | Silveira     |                       | BP - A Beneficência Portuguesa de São Paulo    | São Paulo, São Paulo                     |  |
| Agnes C.                                                 | Lisboa       |                       | BP - A Beneficência Portuguesa de São Paulo    | São Paulo, São Paulo                     |  |
| Marco A.V.                                               | Guedes       |                       | Hospital Ana Nery                              | Salvador, Bahia                          |  |
| Luiz C.S.                                                | Passos       |                       | Hospital Ana Nery                              | Salvador, Bahia                          |  |
| Daniela C.                                               | Dorta        |                       | Hospital Ana Nery                              | Salvador, Bahia                          |  |
| Ramana A.                                                | Rangel       |                       | Hospital Ana Nery                              | Salvador, Bahia                          |  |
| Péricles                                                 | Duarte       |                       | Hospital do Câncer UOPECCAN                    | Cascavel, Parana                         |  |

\*Indicates required information. Only first name, last name, and suffix will appear in PubMed.

| *First Name and Middle Initial(s) | *Last Name  | *Suffix (eg, Jr, III) | Institution                                              | Location (city, state/province, country) |
|-----------------------------------|-------------|-----------------------|----------------------------------------------------------|------------------------------------------|
| Eraldo de A.                      | Lúcio       |                       | Hospital São Francisco – Santa Casa de Porto Alegre      | Porto Alegre, Rio Grande do Sul          |
| Eduardo B.                        | Tondo       |                       | Hospital São Francisco – Santa Casa de Porto Alegre      | Porto Alegre, Rio Grande do Sul          |
| Pablo A.A.                        | Vaz         |                       | Hospital São Francisco – Santa Casa de Porto Alegre      | Porto Alegre, Rio Grande do Sul          |
| Paula K.                          | de Oliveira |                       | Hospital São Francisco – Santa Casa de Porto Alegre      | Porto Alegre, Rio Grande do Sul          |
| Lúcio C.                          | de Oliveira | Junior                | Hospital Geral Cleriston Andrade                         | Feira de Santana, Bahia                  |
| Paulo H.P.                        | Ferreira    |                       | Hospital Geral Cleriston Andrade                         | Feira de Santana, Bahia                  |
| Patrick H.S.                      | Sampaio     |                       | Hospital Geral Cleriston Andrade                         | Feira de Santana, Bahia                  |
| Maurício G.S.                     | Serra       |                       | Hospital Geral Cleriston Andrade                         | Feira de Santana, Bahia                  |
| Thiago C.                         | Lisboa      |                       | Hospital Santa Rita – Santa Casa de Porto Alegre         | Porto Alegre, Rio Grande do Sul          |
| Caroline                          | Fachini     |                       | Hospital Santa Rita – Santa Casa de Porto Alegre         | Porto Alegre, Rio Grande do Sul          |
| André P.                          | Torelly     |                       | Hospital Santa Rita – Santa Casa de Porto Alegre         | Porto Alegre, Rio Grande do Sul          |
| Alldren                           | Souza       |                       | Hospital Santa Rita – Santa Casa de Porto Alegre         | Porto Alegre, Rio Grande do Sul          |
| Fábio H.                          | Lacerda     |                       | Hospital da Luz                                          | São Paulo, São Paulo                     |
| Eliana V. N.                      | Martins     |                       | Hospital da Luz                                          | Sao Paulo, São Paulo                     |
| Bruno A.M.P.                      | Besen       |                       | Hospital da Luz                                          | Sao Paulo, São Paulo                     |
| Carlos E.                         | Brandão     |                       | Hospital da Luz                                          | Sao Paulo, São Paulo                     |
| Pérciles                          | Duarte      |                       | Hospital Universitário de Cascavel                       | Cascavel, Parana                         |
| João M.                           | Silva       | Junior                | Hospital do Servidor Público Estadual                    | Sao Paulo, São Paulo                     |
| Flávio W.F.                       | Melo        | Junior                | Hospital do Servidor Público Estadual                    | Sao Paulo, São Paulo                     |
| Flávio A.                         | dos Santos  |                       | Hospital do Servidor Público Estadual                    | Sao Paulo, São Paulo                     |
| João M.                           | Silva       | Junior                | Hospital do Servidor Público Estadual                    | Sao Paulo, São Paulo                     |
| Israel S.                         | Maia        |                       | Hospital Nereu Ramos                                     | Florianopolis, Santa Catarina            |
| Cássio L.                         | Zandonai    |                       | Hospital Nereu Ramos                                     | Florianopolis, Santa Catarina            |
| Eduardo                           | Berbigier   |                       | Hospital Nereu Ramos                                     | Florianopolis, Santa Catarina            |
| Cíntia M.C.                       | Grión       |                       | Hospital Universitário de Londrina                       | Londrina, Santa Catarina                 |
| Josiane                           | Festti      |                       | Hospital Universitário de Londrina                       | Londrina, Santa Catarina                 |
| Ana Luiza                         | Mezzaroba   |                       | Hospital Universitário de Londrina                       | Londrina, Santa Catarina                 |
| José                              | Andrade     |                       | Hospital Geral de Vitória da Conquista                   | Vitoria da Conquista, Bahia              |
| Marianne S.                       | Camargo     |                       | Hospital Geral de Vitória da Conquista                   | Vitoria da Conquista, Bahia              |
| Adriano F.                        | Teixeira    |                       | Hospital Geral de Vitória da Conquista                   | Vitoria da Conquista, Bahia              |
| José de S.                        | Andrade     | Neto                  | Hospital Geral de Vitória da Conquista                   | Vitoria da Conquista, Bahia              |
| Michele M.G.                      | de Godoy    |                       | Hospital das Clínicas Universidade Federal de Pernambuco | Recife, Pernambuco                       |
| Andréia de F. T.                  | de Mendonça |                       | Hospital das Clínicas Universidade Federal de Pernambuco | Recife, Pernambuco                       |
| Mara L.F.S.                       | Mendes      |                       | Hospital das Clínicas Universidade Federal de Pernambuco | Recife, Pernambuco                       |
| Renata C.I.C.                     | Beltrão     |                       | Hospital das Clínicas Universidade Federal de Pernambuco | Recife, Pernambuco                       |
| Edson                             | Romano      |                       | HCor                                                     | Recife, Pernambuco                       |
| Marcelo L.P.                      | Romano      |                       | HCor                                                     | Sao Paulo, São Paulo                     |
| Andre F.                          | Costa       |                       | HCor                                                     | Sao Paulo, São Paulo                     |
| Jorge                             | Farran      |                       | HCor                                                     | Sao Paulo, São Paulo                     |
| Felipe                            | Dal-Pizzol  |                       | Hospital São José                                        | Criciuma, Santa Catarina                 |
| Danusa                            | Damásio     |                       | Hospital São José                                        | Criciuma, Santa Catarina                 |
| Renata                            | Gonçalves   |                       | Hospital São José                                        | Criciuma, Santa Catarina                 |

\*Indicates required information. Only first name, last name, and suffix will appear in PubMed.

| *First Name and Middle Initial(s) | *Last Name  | *Suffix (eg, Jr, III) | Institution                                   | Location (city, state/province, country) |
|-----------------------------------|-------------|-----------------------|-----------------------------------------------|------------------------------------------|
| Émerson B.                        | da Silva    |                       | Hospital Geral de Caxias do Sul               | Caxias do Sul, Rio Grande do Sul         |
| Luiz de F.                        | Ferreira    |                       | Hospital Geral de Caxias do Sul               | Caxias do Sul, Rio Grande do Sul         |
| Rafael L.                         | da Costa    |                       | Hospital Geral de Caxias do Sul               | Caxias do Sul, Rio Grande do Sul         |
| Kellen                            | Lopes       |                       | Hospital Geral de Caxias do Sul               | Caxias do Sul, Rio Grande do Sul         |
| Miquéias M.L.                     | Silva       |                       | Hospital SAMUR                                | Vitoria da Conquista, Bahia              |
| Douglas L.A.B.                    | de Matos    |                       | Hospital SAMUR                                | Vitoria da Conquista, Bahia              |
| Renata de A.                      | Marques     |                       | Hospital SAMUR                                | Vitoria da Conquista, Bahia              |
| Glauco A.                         | Westphal    |                       | Centro Hospitalar UNIMED Joinville            | Joinville, Santa Catarina                |
| Miriam C.                         | Machado     |                       | Centro Hospitalar UNIMED Joinville            | Joinville, Santa Catarina                |
| Juliano                           | Ramos       |                       | Centro Hospitalar UNIMED Joinville            | Joinville, Santa Catarina                |
| Luiz M.S.                         | Malbouisson |                       | Hospital das Clinicas FMUSP-UAC               | Sao Paulo, São Paulo                     |
| Bruno N.                          | Lucena      |                       | Hospital das Clinicas FMUSP-UAC               | Sao Paulo, São Paulo                     |
| Marlus M.                         | Thompson    |                       | Hospital Evangélico Cachoeiro do Itapemirim   | Cachoeira do Itapemirim, Espirito Santo  |
| Juliano                           | Ramos       |                       | Hospital Evangélico Cachoeiro do Itapemirim   | Cachoeira do Itapemirim, Espirito Santo  |
| Lanese M.                         | Figueiredo  |                       | Hospital Distrital Evandro Ayres de Moura     | Fortaleza, Ceara                         |
| Luana F.                          | Mourão      |                       | Hospital Distrital Evandro Ayres de Moura     | Fortaleza, Ceara                         |
| Thiago S.                         | Garces      |                       | Hospital Distrital Evandro Ayres de Moura     | Fortaleza, Ceara                         |
| Israel da S.                      | Maia        |                       | Hospital Baía Sul                             | Florianopolis, Santa Catarina            |
| Jaqueline F.                      | Rohr        |                       | Hospital Baía Sul                             | Florianopolis, Santa Catarina            |
| Fernanda                          | Fontanela   |                       | Hospital Baía Sul                             | Florianopolis, Santa Catarina            |
| Cassia P. B.                      | Martins     |                       | Hospital Baía Sul                             | Florianopolis, Santa Catarina            |
| Álvaro                            | Rea         | Neto                  | Instituto de Neurologia de Curitiba           | Curitiba, Parana                         |
| Fernanda                          | Reese       |                       | Instituto de Neurologia de Curitiba           | Curitiba, Parana                         |
| Mirella                           | Oliveira    |                       | Instituto de Neurologia de Curitiba           | Curitiba, Parana                         |
| André L. N.                       | Gobatto     |                       | Hospital da Cidade                            | Salvador, Bahia                          |
| Luciana S.                        | de Mattos   |                       | Hospital da Cidade                            | Salvador, Bahia                          |
| Caroline B.                       | de Oliveira |                       | Hospital da Cidade                            | Salvador, Bahia                          |
| Meton S.                          | de Alencar  | Filho                 | Hospital e Maternidade São Vicente            | Barbalha, Ceara                          |
| Jussara A.                        | Arraes      |                       | Hospital e Maternidade São Vicente            | Barbalha, Ceara                          |
| João G.T.                         | Alves       |                       | Hospital e Maternidade São Vicente            | Barbalha, Ceara                          |
| Thiago C.                         | De Moraes   |                       | Hospital e Maternidade São Vicente            | Barbalha, Ceara                          |
| Antônio A. P.                     | Fagundes    | Jr                    | Hospital Home                                 | Brasilia, Federal District               |
| Roberta T.                        | Tallarico   |                       | Hospital Home                                 | Brasilia, Federal District               |
| Thais                             | Coutinho    |                       | Hospital Home                                 | Brasilia, Federal District               |
| Ronald                            | Torres      |                       | Hospital Home                                 | Brasilia, Federal District               |
| Fernando J.S.                     | Ramos       |                       | BP Mirante                                    | Sao Paulo, São Paulo                     |
| Fernanda C.                       | Athalla     |                       | BP Mirante                                    | Sao Paulo, São Paulo                     |
| Mauricio H.C.                     | dos Santos  |                       | BP Mirante                                    | Sao Paulo, São Paulo                     |
| Paulo M.G.                        | Nose        |                       | BP Mirante                                    | Sao Paulo, São Paulo                     |
| Cássia R.                         | Shinotsuka  |                       | Instituto Estadual do Cérebro Paulo Neiemeyer | Rio de Janeiro, Rio de Janeiro           |
| Pedro                             | Kurtz       |                       | Instituto Estadual do Cérebro Paulo Neiemeyer | Rio de Janeiro, Rio de Janeiro           |
| Bruno                             | Guimarães   |                       | Instituto Estadual do Cérebro Paulo Neiemeyer | Rio de Janeiro, Rio de Janeiro           |

\*Indicates required information. Only first name, last name, and suffix will appear in PubMed.

| *First Name and Middle Initial(s) | *Last Name  | *Suffix (eg, Jr, III) | Institution                                        | Location (city, state/province, country) |
|-----------------------------------|-------------|-----------------------|----------------------------------------------------|------------------------------------------|
| Luciana G.                        | Pereira     |                       | Hospital Vila Santa Catarina                       | Sao Paulo, São Paulo                     |
| Raquel B.                         | Jupato      |                       | Hospital Vila Santa Catarina                       | Sao Paulo, São Paulo                     |
| Bruno de A.                       | Bravim      |                       | Hospital Vila Santa Catarina                       | Sao Paulo, São Paulo                     |
| Marcos F.                         | Knibel      |                       | Hospital São Lucas Copacabana                      | Rio de Janeiro, Rio de Janeiro           |
| Allan S.                          | da Silva    |                       | Hospital São Lucas Copacabana                      | Rio de Janeiro, Rio de Janeiro           |
| Vinícius G.                       | de Luca     |                       | Hospital São Lucas Copacabana                      | Rio de Janeiro, Rio de Janeiro           |
| Niklas                            | Soderberg   |                       | Hospital das Clínicas FMUSP-UTI Ortopedia e Trauma | Sao Paulo, São Paulo                     |
| Roseny dos R.                     | Rodrigues   |                       | Hospital das Clínicas FMUSP-UTI Ortopedia e Trauma | Sao Paulo, São Paulo                     |
| Luis E.P.                         | Pfingsten   |                       | Hospital das Clínicas FMUSP-UTI Ortopedia e Trauma | Sao Paulo, São Paulo                     |
| Cassiano                          | Teixeira    |                       | Hospital Moinhos de Vento                          | Porto Alegre, Rio Grande do Sul          |
| José H.D.                         | Barth       |                       | Hospital Moinhos de Vento                          | Porto Alegre, Rio Grande do Sul          |
| Giselle C.                        | Pratini     |                       | Hospital Moinhos de Vento                          | Porto Alegre, Rio Grande do Sul          |
| Luiz                              | Dalfior     | Junior                | Hospital Santa Marcelina                           | Sao Paulo, São Paulo                     |
| Márcio H.                         | Kai         |                       | Hospital Santa Marcelina                           | Sao Paulo, São Paulo                     |
| Sérgio                            | Blecher     |                       | Hospital Santa Marcelina                           | Sao Paulo, São Paulo                     |
| Hugo C. A.                        | Urbano      |                       | Hospital Vila da Serra                             | Nova Lima, Minas Gerais                  |
| Lucas L.                          | Carvalho    |                       | Hospital Vila da Serra                             | Nova Lima, Minas Gerais                  |
| Danielle C. A.                    | Moreira     |                       | Hospital Vila da Serra                             | Nova Lima, Minas Gerais                  |
| Ana L. S.                         | Bernardes   |                       | Hospital Vila da Serra                             | Nova Lima, Minas Gerais                  |
| Vandack A.                        | Nobre       | Júnior                | Hospital da Clínicas UFMG                          | Belo Horizonte, Minas Gerais             |
| Paula F.                          | Vassallo    |                       | Hospital da Clínicas UFMG                          | Belo Horizonte, Minas Gerais             |
| Cecília G.                        | Ravetti     |                       | Hospital da Clínicas UFMG                          | Belo Horizonte, Minas Gerais             |
| Ho Y.                             | Li          |                       | Hospital das Clínicas FMUSP-UTI MI                 | Sao Paulo, São Paulo                     |
| Vivian V. T.                      | Sales       |                       | Hospital das Clínicas FMUSP-UTI MI                 | Sao Paulo, São Paulo                     |
| Renata                            | Guazzelli   |                       | Hospital das Clínicas FMUSP-UTI MI                 | Sao Paulo, São Paulo                     |
| Álvaro                            | Rea         | Neto                  | Hospital Vita Batel                                | Curitiba, Parana                         |
| Rafael D.                         | de Oliveira |                       | Hospital Vita Batel                                | Curitiba, Parana                         |
| Leandro                           | Pozzo       |                       | Hospital Vita Batel                                | Curitiba, Parana                         |
| Leandro U.                        | Taniguchi   |                       | Hospital das Clínicas FMUSP-UTI PSM                | Sao Paulo, São Paulo                     |
| Pedro V.                          | Mendes      |                       | Hospital das Clínicas FMUSP-UTI PSM                | Sao Paulo, São Paulo                     |
| Bruno A. M. P.                    | Besen       |                       | Hospital das Clínicas FMUSP-UTI PSM                | Sao Paulo, São Paulo                     |
| Suzana M. A.                      | Lobo        |                       | Hospital de Base de São José do Rio Preto          | São Jose do Rio Preto, São Paulo         |
| Miriam                            | Machado     |                       | Hospital Dona Helena                               | Joinville, Santa Catarina                |
| Ana B. B.                         | Camacho     |                       | Hospital Dona Helena                               | Joinville, Santa Catarina                |
| Pablo O.                          | Tomba       |                       | Hospital do Câncer de Barretos – Jales             | Jales, São Paulo                         |
| Fred C. T.                        | Lizidatti   |                       | Hospital do Câncer de Barretos – Jales             | Jales, São Paulo                         |
| Walter C. G.                      | Baptista    |                       | Hospital Novo Atibaia                              | Atibaia, São Paulo                       |
| Aline R.                          | Moreira     |                       | Hospital Novo Atibaia                              | Atibaia, São Paulo                       |
| Manoela M.                        | de Sousa    |                       | Hospital Novo Atibaia                              | Atibaia, São Paulo                       |
| Marcelo O.                        | Santos      |                       | Hospital de Clínicas UFPR                          | Curitiba, Parana                         |
| Karla                             | Moretto     |                       | Hospital de Clínicas UFPR                          | Curitiba, Parana                         |
| Priscilla A.                      | de Martins  |                       | Hospital Evangélico de Vila Velha                  | Vila Velha, Parana                       |

## Supplemental Online Content: Nonauthor Collaborators

\*Indicates required information. Only first name, last name, and suffix will appear in PubMed.

| *First Name and Middle Initial(s) | *Last Name  | *Suffix (eg, Jr, III) | Institution                            | Location (city, state/province, country) |
|-----------------------------------|-------------|-----------------------|----------------------------------------|------------------------------------------|
| Liz M. L.                         | de Souza    |                       | Hospital Evangélico de Vila Velha      | Vila Velha, Parana                       |
| Thiago R.                         | Sequeira    |                       | Hospital Evangélico de Vila Velha      | Vila Velha, Parana                       |
| Manoel M. S.                      | Pedrinha    |                       | Hospital Evangélico de Vila Velha      | Vila Velha, Parana                       |
| Marcone L. S.                     | da Rocha    |                       | Hospital São João de Deus              | Divinópolis, Minas Gerais                |
| Francisco R. V.                   | Saleiro     |                       | Hospital São João de Deus              | Divinópolis, Minas Gerais                |
| Tatiana M.                        | Clementino  |                       | Hospital São João de Deus              | Divinópolis, Minas Gerais                |
| Hélio P.                          | Guimarães   |                       | Hospital São Paulo UTI- Clínica Médica | Sao Paulo, São Paulo                     |
| Marcos C. R.                      | Mello       |                       | Hospital São Paulo UTI- Clínica Médica | Sao Paulo, São Paulo                     |
| Mirella C.                        | de Oliveira |                       | Hospital do Trabalhador                | Curitiba, Parana                         |
| Fernanda B.                       | Reese       |                       | Hospital do Trabalhador                | Curitiba, Parana                         |
| Denise M.                         | Ferreira    |                       | Hospital das Clínicas da UFG           | Goiania, Goiás                           |
| Fernanda A. F.                    | Gonçalves   |                       | Hospital das Clínicas da UFG           | Goiania, Goiás                           |
| Luiz M. S.                        | Malbouisson |                       | Hospital das Clínicas FMUSP-UTI Trauma | Sao Paulo, São Paulo                     |
| Roberta M. L.                     | Roepke      |                       | Hospital das Clinicas FMUSP-UTI Trauma | Sao Paulo, São Paulo                     |
| Bruno M.                          | Tomazini    |                       | Hospital das Clinicas FMUSP-UTI Trauma | Sao Paulo, São Paulo                     |
| Sidiner M.                        | Vaz         |                       | Casa de Caridade de Carangola          | Carangola, Minas Gerais                  |
| Miria Bonjour                     | Laviola     |                       | Casa de Caridade de Carangola          | Carangola, Minas Gerais                  |
| Thiago D.                         | Correa      |                       | Hospital Municipal do M'Boi Mirim      | Sao Paulo, São Paulo                     |
| Roger M.                          | Alencar     |                       | Hospital Municipal do M'Boi Mirim      | Sao Paulo, São Paulo                     |
| Denise N.                         | Freitas     |                       | Hospital Municipal do M'Boi Mirim      | Sao Paulo, São Paulo                     |
| Heitor P.                         | Póvoas      | Filho                 | Hospital de Ilheus                     | Ilheus, Bahia                            |
| Liliane B. S.                     | Passos      |                       | Hospital das Clinicas de Uberlândia    | Uberlandia, Minas Gerais                 |
| Juliane de M.                     | Silva       |                       | Hospital das Clinicas de Uberlândia    | Uberlandia, Minas Gerais                 |
